# Supplementary material for: Expanding the Genotypic and Phenotypic Spectrum of PGAP1 Deficiency: Clinical and Functional Insights from 15 Patients
Source: Research Square preprint supplement (doi:10.21203/rs.3.rs-8463184/v1), 2026-01-21
Supplement: Supplementary file 1 [file 0b91a50107384eeea5c17c2a.xlsx]

## Sheet: Sheet1
Case		Present Study (started in 2021)															Murakami et al. (2014)19		Novarino et al. (2014)20		Bosch et al. (2015)16	Williams et al. (2015)22	Granzow et al. (2015)17		Kettwig et al. (2016)18		Trujillano et al. (2017)21	Baris and Yavas (2025)34
reports/studies
Individuals		A-II:1	A-II:2	B-II:1	B-II:2	B-II:3	C-II:1	C-II:2	D-II	E-II	F-II	G-II	H-II	I-II	J-II	K-II	1	2	1	2			1	2	1	2
Genotype		Homozygous splice site c.1221-3A>G		Homozygous splice site c.2286+5G>A			Compound heterozygous c.1089+1G>A and c.1089+5delG		Compound heterozygous c.2199del [p.(Leu735*)] and c.2357_2358insTA [p.(Ser787*)]	Homozygous missense c.1367A>G [p.(Glu456Gly)]	Homozygous frameshift c.289del [p.(Ser97Valfs*30)]	Homozygous c.1081_1089+3del [p.(Val360_Asn363del)]	Homozygous frameshift mutation c.2024delT [p.(Leu681Argfs*4)]	Homozygous splice site mutation c.2286+5G>T	Compound heterozygous c.2199del [p.(Leu735*)] and c.2357_2358insTA [p.(Ser787*)]	Compound heterozygous	Homozygous c.589_591del [(p.Leu197del)]		Homozygous splice site mutation c.1952+1G>T		Compound heterozygous c.274_276del [(p.Pro92del)]	Compound heterozygous c.1572 T>A [(p.Tyr524*)]	Homozygous splice site mutation c.1090- 2A>G		Compound heterozygous c.334_335InsA [(p.Arg112fs)]		Homozygous c.2349delinsATAATCCCAAACAA [(p.His783Glnf s*2)]	Homozygous
																c.2357_2358insTA [p.(Ser787*)]					and c.921_925del [(p.Lys308Asnfs*25)]	and c.1396C > T [p.(Gln466*)]			and c.1173G>C [(p.Leu391Leu)]			(c.1226_1229dup) [p.(Val411Argfs*3)]
																c.2241T>G [p.(Cys747Trp)]
Gender		F	F	F	F	M	M	F	F	F	F	M	M	M	F	M	F	M	M	M	M	M	F	M	M	M	M	F
Age (years) at investigation		9	5	15	13	5.5	23	18	6	18	1`	1	8M	1	3	12	4.41667	2.75	6.5	2025-12-09	7.83333	3	9	5.5	2	2	1	9M
Facial dysmorphisms		+	-	+	+	+	+	+	-	+	+ *	+	-	+	+	+	+	+	-	-	+	+	-	-	+	+	NR	+
Microcephaly		+	-	+	+	+	-	-	-	+	-	+	-	-	-	NR	+	+	NR	NR	-	+	+	+	+	+	NR	+
Intellectual disability		+	+	+	+	+	+	+	+	+	+	+	-	+	+	+	IQ <35	IQ <35	+	-	IQ 49	+	+	+	+	+	+	+
Speech		-	-	-	-	-	-	-	-	-	+	-	-	-	-	-	Babble	NR	NR	NR	2 1/2	Delayed	-	-	Babble		Delayed	Delayed
Motor developmental delay		+	-	+	+	+	+	+	+	+	+	+	+	+	+	+	+	+	+	-	+	+	+	+	+	+	+	+
Walking independently		-	-	+	+	+	7 years ataxia	First supported steps at 11 years, no independent walking	+	-	Can hold objects, can sit with support for few minutes only	-	+	-	-	-	+	-	NR	Can walk with support	+	-	-	NR	-	-	NR	-
Hypotonia		+	-	+	+	+	In childhood	NR	NR	In childhood	+	+	+	+	+	+	+	+	NR	NR	+	+	+	+	+	+	NR	+
											truncal hypotonia and periphral hypertonia			Truncal hypotonia
Neuropathy/Spasticity		-	-	+	+	+	-	-		+	+	-	-	+	+	-	NR	NR	+	+	-	-	+	-	-	-	NR	+
Stereotypic/dyskinetic movements		-	-	+	+	+	-	-	+	+	-	-	+	+	+	-	+	+	+	+	-	+	-	+	-	-	NR	+
														(repetitive hand nesting/clapping, gaze aversion)
Eating/Feeding		Milk bottles. Can self-feed. Difficulty biting hard foods.	-	Can self-feed solid and semi-solid foods.	Can self-feed solid and semi-solid foods.	Can self-feed solid and semi-solid foods.	-	-	-	-	-	Difficulty bitting hard food, cannot self-feed and bite	Difficulty bitting hard food, cannot self-feed and bite	Feeding refusal in infancy, few signals, now stable. Needed half-sleep feeding early on	Refuses all foods, fully g-tube fed	Difficulty bitting hard food, cannot self-feed and bite	Milk bottles		NR	NR	-	G-tube feeding	Failure to thrive	-	Milk bottles		NR	NR
Respiration		Sleep apnoea	-	-	-	-	-	-	-	-	-	-	-	-	-	-	-	-	NR	NR	-	-	-	+	Recurrent apnoea		NR	NR
Ophthalmological findings		Hypermetropia	-	NR	NR	NR	Divergent strabismus	Strabismus	NR	Strabismus	Strabismus	Poor visual behaviour, likely cortical. Dysfluent eye movements. ERG felt to be normal	Strabismus until 6 yrs	-	Strabismus and CVI	Nystagmus	-	-	-	-	CVI	CVI	Retinal dystrophy (ERG), nystagmus		Nystagmus	Nystagmus	NR	NR
Seizures/EEG abnormalities		+/NR	+/NR	+/NR	+/NR	+/NR	+/+	+/+	-	+/+	No seizures	no seizures, EEG Background activity felt to be normal. Right frontal spike and wave discharges	no seizures, no EEG abnormalities	EEG: intermittent right temporal focal finding (possibly artefact), otherwise normal	- / normal EEG	+/+	+/NR	-/NR	NR	NR	-/NR	-/+	-/-	-/-	-/-	+/+	+/NR	+/NR
											Normal EEG
Imaging		-	NR	Normal (MRI)			Normal (cMRI)		-	Normal (cMRI)	-	Deficiency of the rostrum of the corpus callosum anteriorly and generalized thinning of the corpus callosum.	Normal (MRI)	(MRI) minor widening of frontal CSF spaces	Normal (MRI)	Normal (MRI)	Brain atrophy (CT)	NR	Prominent cortical sulci and widened sylvian fissues (MRI)	Corpus callosum agnesis, vermis hypoplasia, defective myelination (MRI)	Normal (MRI)	Thinning of the corpus collosum, diminished white matter, prominence of the right posterior Sylvian fissure (MRI). Repeated MRIs showed diffused volume loss, mild delayed myelination and signal abnormality in central tegmental tracts of pons concerning.	Normal (MRI)		Frontal accentuated brain atrophy and significant delayed myelination (MRI). Follow up MRI at two years old show increase in myelination, but magnetisation transfer (MT) still show reduction of signal from myelin compared to age-matched controls, and less pronounced brain atrophies.		NR	Corpus callosum agenesis and cerebellar hypoplasia
																(Pineal cyst)
Additional phenotypes		Associated scoliosis					Scoliosis, prolonged neonatal icterus, reduced sensitivity to pain	Scoliosis	-	first seizure at 3 years old. Current treatment with keppra and noiafren. Drooling needing botox. scoliosis needing arthrodesis (from T2 to pelvis). Tooth malposition		Bilateral metatarsus adductus – had serial casting, now in boots and bars.	Sleep problems during the first 5 ys of life	variable social interaction, reduced trunk control	Severe constipation (daily enemas, MiraLAX, probiotics, on periactin), requires full ADL care. Smiles often but prefers calm environment.	Gluten and lactose intolerant											Abnormality in skin pigmentation and pinna, clinodactyl of 5th finger, shortening of all distal phalanges, tapered distal phalanges of finger, short stature.	Hepatomegaly; short/blunt fingers; “lacking physical sensation”; somnolence; parental consanguinity; transient low biotinidase (normalized).
																Scoliosis and Talipes (clubfoot)
	The following abbreviations are used: EEG, electroencephalogram; NR, not reported, + yes and – no/ not present.
	* Hypertelorism, Prominent forehead, Down slanting palpebral fissures, Long philtrum, Bulbous nasal tip, everted alae nasi, prominent nose, maxillary prognathism, unilateral Strabismus (exotropia)
